# Supplementary material for: Clade-3 Bat Sarbecovirus PRD0038 Reveals Constraints on Coronavirus Emergence and Immune Sensitivity
Source: Research Square preprint supplement (doi:10.21203/rs.3.rs-9954172/v1), 2026-07-02
Supplement: Supplementary file 1 [file 8e34eafc34c1fed631392ed7.xlsx]

## Sheet: Sheet1
Table S1. Cryo-EM data collection and refinement statistics.
Table S1. Cryo-EM data collection and refinement statistics.
Sample	S-PRD0038 WT consensus (3 RBDs down)	S-PRD0038 D603G consensus (3 RBDs down)	S-PRD0038 Q617K consensus (3 RBDs down)	S-PRD0038 Q617K subclass: 3 RBDs down	S-PRD0038 Q617K subclass: 1 RBD up	S-PRD0038 D603G Q617K consensus (1 RBD up)	S-PRD0038 D603G Q617K subclass:3 RBDs down	S-PRD0038 D603G Q617K subclass:1 RBD up	S-PRD0038 D603G Q617K subclass:2 RBDs up
PDB ID	9YME	9YP7	9Z5V	9YP5	9YPA	9YMH	9YO0	9YOD	9YOH
EMDB ID	EMD-73104	EMD-73286	EMD-73825	EMD-73284	EMD-73289	EMD-73106	EMD-73248	EMD-73250	EMD-73254
Data Collection and processing
Microscope	Thermo Fisher Tundra Cryo-TEM					FEI Titan Krios
Detector	Falcon C					Gatan K3
Magnification	180000					81000
Voltage (kV)	100					300
Electron exposure (e-/Å^2)	30.84	30	30.02			68
Defocus Range (µm)	0.5 to 2.5	0.6 to 2.8	0.6 to 2.8			1.5 to 2.6
Pixel size (Å)	1.47					1.1
Reconstruction software	cryoSPARC
Symmetry imposed	C1
Movies	10985	16071	15335			4709
Initial particle images (no.)	2359082	6429178	5629899			2222630
Final particle images (no.)	395440	710613	488492	434328	54190	574229	113708	229415	211106
Map resolution (Å)	3.68	3.69	4.25	4.24	5.9	3.45	3.69	3.6	3.67
FSC threshold	0.143
Refinement
Initial model used	8U29
Model resolution (Å)	3.8	3.9	4.4	4.4	6.4	3.5	3.9	3.7	3.8
FSC threshold	0.5
Model composition
Nonhydrogen atoms	26167	26155	26191	26191	24655	23505	23419	23505	23296
Protein residues	3303	3303	3303	3303	3160	3064	3074	3064	3034
R.M.S. deviations
Bond lengths (Å)	0.004	0.004	0.004	0.004	0.005	0.004	0.004	0.004	0.004
Bond angles (°)	0.751	0.821	0.88	0.877	0.908	0.72	0.762	0.73	0.742
Validation
MolProbity score	1.08	1.17	1.29	1.2	1.48	0.99	1.05	1.02	1.01
Clashscore	0.59	0.81	1.43	1.07	1.93	0.46	0.48	0.5	0.6
Poor rotamers (%)	1.19	1.15	0.25	0.25	0.25	0.13	0.87	0.43	0.66
Ramachandran plot
Favored regions (%)	95.29	94.65	93.71	94.29	90.91	95.35	94.31	95.01	95.59
Allowed (%)	4.71	5.32	6.23	5.62	8.93	4.42	5.49	4.79	4.25
Disallowed regions (%)	0	0.03	0.06	0.09	0.16	0.23	0.2	0.2	0.17
