# Supplementary material for: Clade-3 Bat Sarbecovirus PRD0038 Reveals Constraints on Coronavirus Emergence and Immune Sensitivity
Source: Research Square preprint supplement (doi:10.21203/rs.3.rs-9954172/v1), 2026-07-02
Supplement: Supplementary file 3 [file ce1e19744f260cc3bf49882f.xlsx]

## Sheet: P3
Name	Minimum	Amino Acid Change	Average Quality	CDS Position	Change	Codon Change	Coverage	Polymorphism Type	Protein Effect	Variant Frequency	gene
A	4003	V -> I	30	3742	G -> A	GUC -> AUC	2692	SNP (transition)	Substitution	0.899	orf1ab
A	4562	A -> D	26	4301	C -> A	GCU -> GAU	2334	SNP (transversion)	Substitution	0.768	orf1ab
T	5455	L -> F	26	5194	C -> T	CUU -> TUU	4122	SNP (transition)	Substitution	0.041	orf1ab
C	5542	S -> P	31	5281	T -> C	UCG -> CCG	3311	SNP (transition)	Substitution	0.029	orf1ab
C	6797	L -> P	29	6536	T -> C	CUA -> CCA	2399	SNP (transition)	Substitution	0.022	orf1ab
C	13427		26	13167	T -> C	GGU -> GGC	2640	SNP (transition)	None	0.035	orf1ab
C	14534		28	14274	T -> C	GGU -> GGC	2480	SNP (transition)	None	0.021	orf1ab
C	14633		31	14373	T -> C	GGU -> GGC	4056	SNP (transition)	None	0.021	orf1ab
C	16284		26	16024	T -> C	UUA -> CUA	4798	SNP (transition)	None	0.8	orf1ab
C	19731	W -> R	26	19471	T -> C	UGG -> CGG	3972	SNP (transition)	Substitution	0.022	orf1ab
G	22290	T -> A	26	874	A -> G	ACC -> GCC	5502	SNP (transition)	Substitution	0.054	S
A	23265	Q -> K	26	1849	C -> A	CAG -> AAG	4180	SNP (transversion)	Substitution	0.857	S
T	25256		30	61	C -> T		5424	SNP (transition)	Truncation	0.042	ORF3
T	27897		27	231	C -> T	GAC -> GAT	5301	SNP (transition)	None	0.827	N
C	29241		32		A -> C		1181	SNP (transversion)		0.027
G	29241		30		A -> G		1181	SNP (transition)		0.023
		Nonsynonymous (Variant Frequency > 5%)
		Synonymous (Variant Frequency > 5%)

## Sheet: P4
Name	Minimum	Amino Acid Change	Average Quality	CDS Position	Change	Codon Change	Coverage	Polymorphism Type	Protein Effect	Variant Frequency	gene
C	742	W -> R	27	481	T -> C	UGG -> CGG	4853	SNP (transition)	Substitution	0.023	orf1ab
A	4003	V -> I	32	3742	G -> A	GUC -> AUC	3436	SNP (transition)	Substitution	0.956	orf1ab
A	4562	A -> D	28	4301	C -> A	GCU -> GAU	3208	SNP (transversion)	Substitution	0.912	orf1ab
C	5542	S -> P	32	5281	T -> C	UCG -> CCG	4459	SNP (transition)	Substitution	0.028	orf1ab
T	10437		30	10176	C -> T	GAC -> GAT	7006	SNP (transition)	None	0.695	orf1ab
G	12154	M -> V	26	11893	A -> G	AUG -> GUG	7353	SNP (transition)	Substitution	0.022	orf1ab
C	13427		26	13167	T -> C	GGU -> GGC	3254	SNP (transition)	None	0.026	orf1ab
C	14633		30	14373	T -> C	GGU -> GGC	4787	SNP (transition)	None	0.021	orf1ab
C	15626		26	15366	T -> C	GCU -> GCC	4588	SNP (transition)	None	0.02	orf1ab
C	16284		30	16024	T -> C	UUA -> CUA	5850	SNP (transition)	None	0.962	orf1ab
G	23224	D -> G	27	1808	A -> G	GAU -> GGU	4027	SNP (transition)	Substitution	0.906	S
A	23265	Q -> K	29	1849	C -> A	CAG -> AAG	4817	SNP (transversion)	Substitution	0.978	S
T	25290	T -> M	31	95	C -> T	ACG -> ATG	5116	SNP (transition)	Substitution	0.054	ORF3
T	26355	L -> F	26	46	C -> T	CUU -> TUU	2625	SNP (transition)	Substitution	0.91	M
A	26999	V -> D	28	14	T -> A	GUU -> GAU	3292	SNP (transversion)	Substitution	0.059	ORF6
T	27897		28	231	C -> T	GAC -> GAT	5466	SNP (transition)	None	0.904	N
G	28803		28	1137	A -> G	AGA -> AGG	6125	SNP (transition)	None	0.936	N
C	29241		31		A -> C		1455	SNP (transversion)		0.03
G	29241		30		A -> G		1455	SNP (transition)		0.027
		Nonsynonymous (Variant Frequency > 5%)
		Synonymous (Variant Frequency > 5%)
